# Supplementary material for: A computational study of CO2 hydrogenation on single atoms of Pt, Pd, Ni and Rh on In2O3(111)
Source: Royal Society of Chemistry journal article supplement (doi:10.1039/d3cy00222e), 2023-01-01
Supplement: d3cy00222e1.pdf [file d3cy00222e1.pdf]

# Supplementary Information

## A computational study of CO<sub>2</sub> hydrogenation on single atoms of Pt, Pd, Ni and Rh adsorbed on In<sub>2</sub>O<sub>3</sub>(111)

Francesco Cannizzaro, Sjoerd Kurstjens, Tom van den Berg, and Emiel J. M. Hensen\* and Ivo A. W. Filot\*

*Laboratory of Inorganic Materials and Catalysis, Department of Chemistry and Chemical Engineering, Eindhoven University of Technology, Eindhoven, The Netherlands 5600 MB (NL)*

\*E-mail: [E.J.M.Hensen@tue.nl](mailto:E.J.M.Hensen@tue.nl)

\*E-mail: [i.a.w.filot@tue.nl](mailto:i.a.w.filot@tue.nl)

## Table of Contents

|                                                                                                        |    |
|--------------------------------------------------------------------------------------------------------|----|
| <b>S1: Binding energies of single atoms on <math>\text{In}_2\text{O}_3(111)</math></b> .....           | 2  |
| <b>S2: Electronic structure analysis</b> .....                                                         | 4  |
| <b>S3: Oxygen vacancies</b> .....                                                                      | 5  |
| <b>S4. Geometries of elementary reaction steps on <math>\text{Ni-In}_2\text{O}_3(111)</math></b> ..... | 6  |
| <b>S5. Geometries of elementary reaction steps on <math>\text{Pd-In}_2\text{O}_3(111)</math></b> ..... | 8  |
| <b>S6. Geometries of elementary reaction steps on <math>\text{Pt-In}_2\text{O}_3(111)</math></b> ..... | 10 |
| <b>S7. Geometries of elementary reaction steps on <math>\text{Rh-In}_2\text{O}_3(111)</math></b> ..... | 12 |
| <b>S8: Parameters for microkinetic simulations</b> .....                                               | 14 |
| <b>S9: Microkinetic simulations</b> .....                                                              | 18 |
| <b>S10: Additional DFT calculations</b> .....                                                          | 21 |
| <b>Supporting References</b> .....                                                                     | 22 |

## S1: Binding energies of single atoms on $\text{In}_2\text{O}_3(111)$

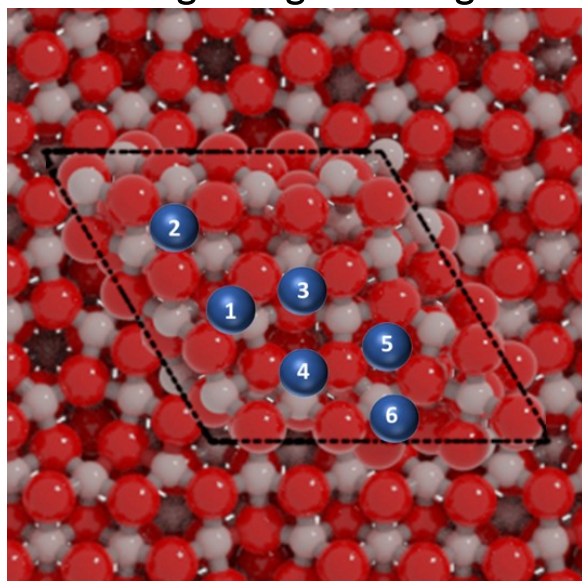

**Fig. S1.** Adsorption sites for single atoms on  $\text{In}_2\text{O}_3(111)$ . Blue: SA. Grey: In. Red: O.

**Table S1.** Adsorption energies (kJ/mol) of single atoms on the indicated by Fig. S1. The reference for the metal (Ni, Pd, Pt and Rh) is a single atom in the gas phase.

| ID | $E_b$ [kJ/mol] |      |      |      |
|----|----------------|------|------|------|
|    | Ni             | Pd   | Pt   | Rh   |
| 1  | -512           | -339 | -481 | -355 |
| 2  | -484           | -328 | -461 | -425 |
| 3  | -484           | -318 | -450 | -401 |
| 4  | -479           | -311 | -457 | -383 |
| 5  | -411           | -309 | -411 | -346 |
| 6  | -415           | -305 | -428 | -328 |

**Table S2.** Reaction and activation energies (kJ/mol) for the migration of SA (SA = Pd, Pt, Ni and Rh) on stable adsorption sites on the  $\text{In}_2\text{O}_3(111)$  surface as shown in Fig.1.

| ID    | $\text{Ni-In}_2\text{O}_3$ |       | $\text{Pd-In}_2\text{O}_3$ |       | $\text{Pt-In}_2\text{O}_3$ |       | $\text{Rh-In}_2\text{O}_3$ |       |
|-------|----------------------------|-------|----------------------------|-------|----------------------------|-------|----------------------------|-------|
|       | $E_R$                      | $E_a$ | $E_R$                      | $E_a$ | $E_R$                      | $E_a$ | $E_R$                      | $E_a$ |
| 1 → 3 | 32                         | 101   | 8                          | 34    | 32                         | 131   | 33                         | 100   |
| 3 → 4 | 11                         | 178   | 3                          | 44    | 15                         | 156   | 20                         | 143   |
| 4 → 5 | 68                         | 154   | 5                          | 27    | 24                         | 101   | 76                         | 142   |

## S2: Electronic structure analysis

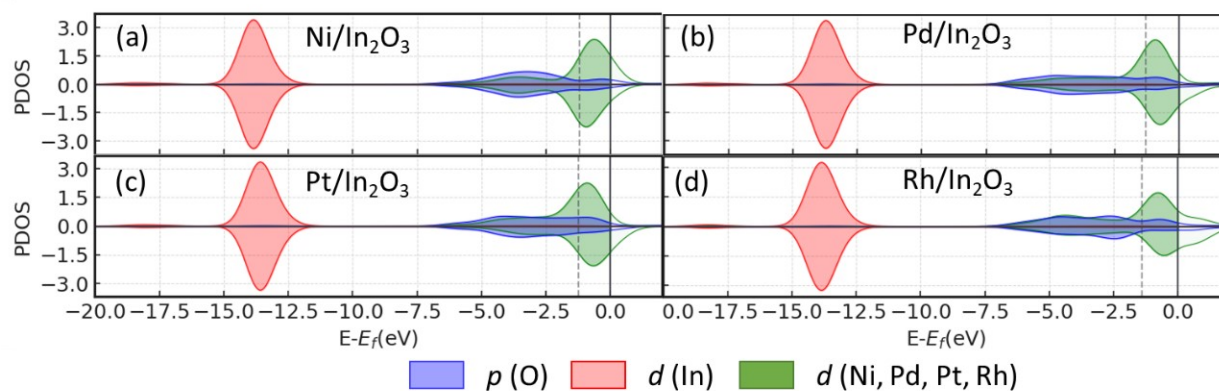

**Fig. S2.** Partial density of state (PDOS) of Ni 3d, Pd 4d, Pt 5d and Rh 4d, O 2p (the O atom adjacent to the metal SA) and In d orbitals. (a) Ni- $\text{In}_2\text{O}_3$ , (b) Pd- $\text{In}_2\text{O}_3$ , (c) Pt- $\text{In}_2\text{O}_3$  and (d) Rh- $\text{In}_2\text{O}_3$ .

### S3: Oxygen vacancies

**Table S3.** Oxygen vacancy formation energies with respect to gas-phase H<sub>2</sub>O (kJ/mol) for bare In<sub>2</sub>O<sub>3</sub> and SA-promoted In<sub>2</sub>O<sub>3</sub> surfaces.

| ID | In <sub>2</sub> O <sub>3</sub> | Ni-In <sub>2</sub> O <sub>3</sub> | Pd-In <sub>2</sub> O <sub>3</sub> | Pt-In <sub>2</sub> O <sub>3</sub> | Rh-In <sub>2</sub> O <sub>3</sub> |
|----|--------------------------------|-----------------------------------|-----------------------------------|-----------------------------------|-----------------------------------|
| 1  | -61                            | 139                               | -77                               | 54                                | 38                                |
| 2  | -61                            | 140                               | -22                               | 215                               | 39                                |
| 3  | -60                            | 139                               | -70                               | -35                               | 105                               |
| 4  | -51                            | 137                               | 29                                | 176                               | 62                                |
| 5  | -51                            | 149                               | 25                                | 173                               | 39                                |
| 6  | -50                            | 154                               | 24                                | 146                               | 128                               |
| 7  | 8                              | 161                               | 75                                | 210                               | 170                               |
| 8  | 5                              | 190                               | 74                                | 210                               | 96                                |
| 9  | 7                              | 161                               | 80                                | 217                               | 141                               |
| 10 | -6                             | 161                               | 53                                | 217                               | 125                               |
| 11 | -5                             | 168                               | 52                                | 187                               | 124                               |
| 12 | -5                             | 169                               | 52                                | 185                               | 123                               |

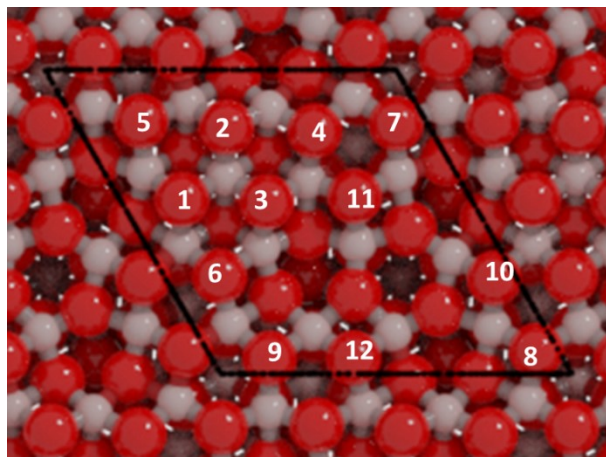

**Fig. S3.** Positions of the 12 surface oxygens for the calculations reported in Table S2 (red: O; grey: In).

**Table S4.** Geometrical parameters (Å) and oxygen vacancy formation energy ( $E_{Ov}$ , in kJ/mol) for the O atom directly connected to the SA with the lowest  $E_{Ov}$ .

|                   | Ni-In <sub>2</sub> O <sub>3</sub> (111) | Pd-In <sub>2</sub> O <sub>3</sub> (111) | Pt-In <sub>2</sub> O <sub>3</sub> (111) | Rh-In <sub>2</sub> O <sub>3</sub> (111) |
|-------------------|-----------------------------------------|-----------------------------------------|-----------------------------------------|-----------------------------------------|
| $d_{M-O}$ / Å     | 1.82                                    | 2.13                                    | 2.10                                    | 1.98                                    |
| $E_{Ov}$ / kJ/mol | 141                                     | -71                                     | -35                                     | 39                                      |

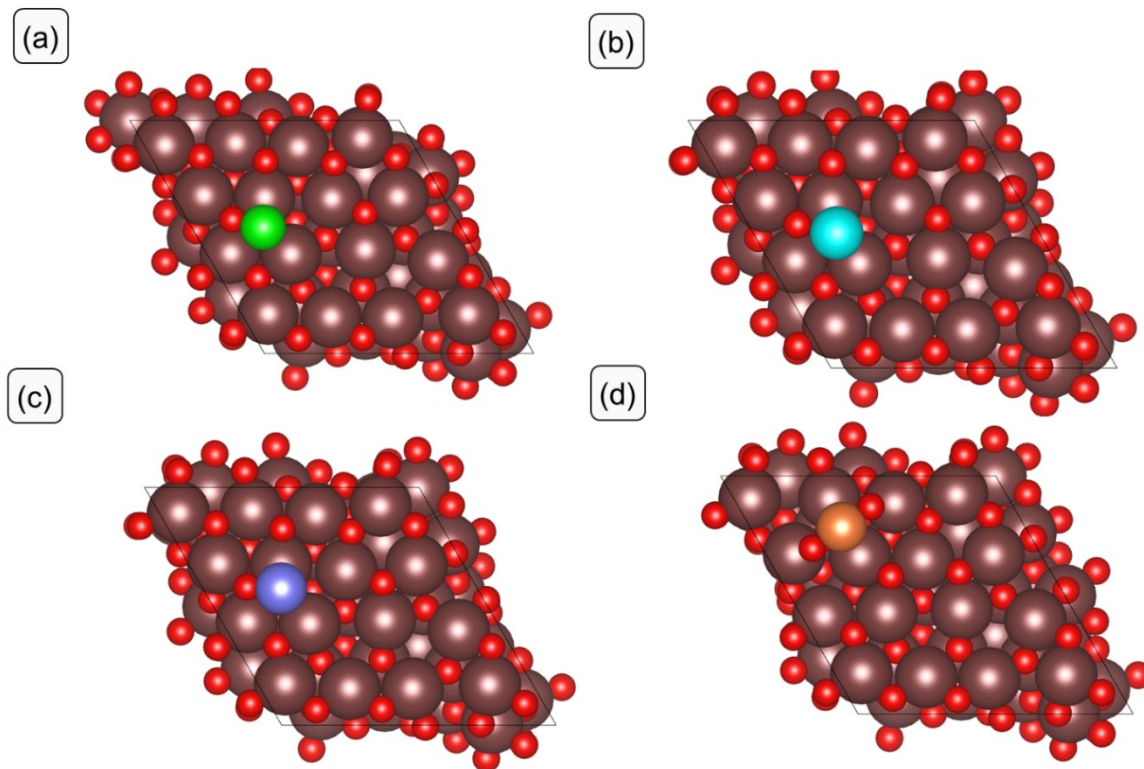

**Fig. S4.** Position of the SA on the  $\text{In}_2\text{O}_3(111)$  surface after formation of an oxygen vacancy. (a) Ni-, (b) Pd-, (c) Pt- and (d) Rh- $\text{In}_2\text{O}_3$ . Brown: In, red: O, green: Ni, light blue: Pd, purple: Pt, orange: Rh.

## S4. Geometries of elementary reaction steps

### CO<sub>2</sub> adsorption

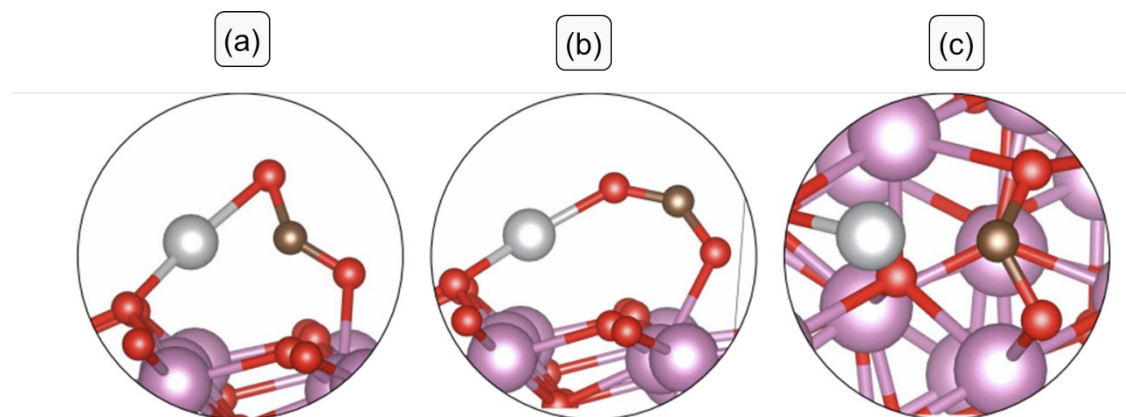

**Fig. S5.** Bonding configurations of CO<sub>2</sub> on SA-In<sub>2</sub>O<sub>3</sub> models. Red: O, black: C, pink: In, grey: Ni, Pd, Pt or Rh. The most stable configuration features CO<sub>2</sub> adsorbed near an oxygen vacancy with both O and C close to the single metal atom. Adsorption configurations depicted in Figure S5b-c are significantly less stable.

**Table S5.** Adsorption energies (kJ/mol) for the configurations reported in Figure S5.

|     | $E_{\text{ads}}$ (kJ/mol)         |                                   |                                   |                                   |
|-----|-----------------------------------|-----------------------------------|-----------------------------------|-----------------------------------|
|     | Ni-In <sub>2</sub> O <sub>3</sub> | Pd-In <sub>2</sub> O <sub>3</sub> | Pt-In <sub>2</sub> O <sub>3</sub> | Rh-In <sub>2</sub> O <sub>3</sub> |
| (a) | -144                              | -31                               | -33                               | -87                               |
| (b) | -44                               | +62                               | +16                               | -33                               |
| (c) | -34                               | +28                               | +37                               | -24                               |

Table S6. Ni-In<sub>2</sub>O<sub>3</sub>

|                                                                                     |                                                                                     |                                                                                     |                                                                                     |                                                                                       |                                                                                       |
|-------------------------------------------------------------------------------------|-------------------------------------------------------------------------------------|-------------------------------------------------------------------------------------|-------------------------------------------------------------------------------------|---------------------------------------------------------------------------------------|---------------------------------------------------------------------------------------|
| 1. $H_2 + 2 * \rightleftharpoons 2H^*$                                              |                                                                                     |                                                                                     | 2. $H^* + OH^* \rightleftharpoons H_2O^*$                                           |                                                                                       |                                                                                       |
| 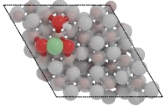   |    |    |    |    |    |
| 3. $H_2O + * \rightleftharpoons H_2O^*$                                             |                                                                                     |                                                                                     | 4. $CO_2(g) + * \rightleftharpoons CO_2^* +$                                        |                                                                                       |                                                                                       |
|    |                                                                                     |    |    |                                                                                       |    |
| 5. $CO_2^* + 2 * + H_2 \rightleftharpoons CO_2^* + 2H^*$                            |                                                                                     |                                                                                     | 6. $CO_2^* + 2H^* \rightleftharpoons HCOO^* + * + H^*$                              |                                                                                       |                                                                                       |
|   |   |   |   |   |   |
| 7. $HCOO^* + H^* \rightleftharpoons H_2COO^* + *$                                   |                                                                                     |                                                                                     | 8. $H_2COO^* \rightleftharpoons H_2CO^* + O^*$                                      |                                                                                       |                                                                                       |
|  |  |  |  |  |  |
| 9. $CH_2O^* + H_2(g) + 2 * \rightleftharpoons CH_2O^* + 2H^*$                       |                                                                                     |                                                                                     | 10. $CH_2O^* + H^* \rightleftharpoons CH_3O^* + *$                                  |                                                                                       |                                                                                       |
|  |  |  |  |  |  |
| 11. $CH_3O^* + H^* \rightleftharpoons CH_3OH(g) + *$                                |                                                                                     |                                                                                     |                                                                                     |                                                                                       |                                                                                       |



|                                                          |  |  |                                                         |  |  |
|----------------------------------------------------------|--|--|---------------------------------------------------------|--|--|
|                                                          |  |  |                                                         |  |  |
| 12. $CO_2^* + * \rightleftharpoons CO^* + O^*$           |  |  | 13. $CO^* + H_2(g) + 2* \rightleftharpoons CO^* + 2H^*$ |  |  |
|                                                          |  |  |                                                         |  |  |
| 14. $CO^* + 2H^* \rightleftharpoons HCO^* + H^*$         |  |  | 15. $HCO^* + H^* \rightleftharpoons H_2CO^* + *$        |  |  |
|                                                          |  |  |                                                         |  |  |
| 16. $CO_2^* + H^* \rightleftharpoons COOH^* + *$         |  |  | 17. $COOH^* + * \rightleftharpoons CO^* + OH^*$         |  |  |
|                                                          |  |  |                                                         |  |  |
| 18. $CO^* + OH^* + H^* \rightleftharpoons H_2O^* + CO^*$ |  |  | 19. $CO^* \rightleftharpoons CO(g) + Ov$                |  |  |
|                                                          |  |  |                                                         |  |  |
| 20. $CO^* \rightleftharpoons CO(g) + *$                  |  |  |                                                         |  |  |
|                                                          |  |  |                                                         |  |  |

Table S7. Pd-In<sub>2</sub>O<sub>3</sub>

|                                                                                     |                                                                                     |                                                                                     |                                                                                      |                                                                                       |                                                                                       |
|-------------------------------------------------------------------------------------|-------------------------------------------------------------------------------------|-------------------------------------------------------------------------------------|--------------------------------------------------------------------------------------|---------------------------------------------------------------------------------------|---------------------------------------------------------------------------------------|
| 1. $H_2 + 2 * \rightleftharpoons 2H^*$                                              |                                                                                     |                                                                                     | 2. $H^* + OH^* \rightleftharpoons H_2O^*$                                            |                                                                                       |                                                                                       |
| 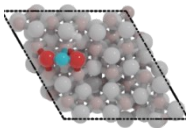   |    |    |    |    |    |
| 3. $H_2O + * \rightleftharpoons H_2O^*$                                             |                                                                                     |                                                                                     | 4. $CO_2(g) + * \rightleftharpoons CO_2^* + *$                                       |                                                                                       |                                                                                       |
|    |                                                                                     |    |    |                                                                                       |    |
| 5. $CO_2^* + 2 * + H_2 \rightleftharpoons CO_2^* + 2H^*$                            |                                                                                     |                                                                                     | 6. $CO_2^* + 2H^* \rightleftharpoons HCOO^* + * + H^*$                               |                                                                                       |                                                                                       |
|   |   |   |   |   |   |
| 7. $HCOO^* + H^* \rightleftharpoons H_2COO^* + *$                                   |                                                                                     |                                                                                     | 8. $H_2COO^* \rightleftharpoons H_2CO^* + O^*$                                       |                                                                                       |                                                                                       |
|  |  |  |  |  |  |
| 9. $CH_2O^* + H_2(g) + 2 * \rightleftharpoons CH_2O^* + 2H^*$                       |                                                                                     |                                                                                     | 10. $CH_2O^* + H^* \rightleftharpoons CH_3O^* + *$                                   |                                                                                       |                                                                                       |
|  |  |  |  |  |  |
| 11. $CH_3O^* + H^* \rightleftharpoons CH_3OH(g) + *$                                |                                                                                     |                                                                                     |                                                                                      |                                                                                       |                                                                                       |
|  |  |  |                                                                                      |                                                                                       |                                                                                       |

|                                                                                     |                                                                                     |                                                                                     |                                                                                     |                                                                                       |                                                                                       |
|-------------------------------------------------------------------------------------|-------------------------------------------------------------------------------------|-------------------------------------------------------------------------------------|-------------------------------------------------------------------------------------|---------------------------------------------------------------------------------------|---------------------------------------------------------------------------------------|
| 12. $CO_2^* + * \rightleftharpoons CO^* + O^*$                                      |                                                                                     |                                                                                     | 13. $CO^* + H_2(g) + 2* \rightleftharpoons CO^* + 2H^*$                             |                                                                                       |                                                                                       |
| 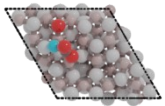   |    |    |   |    |    |
| 14. $CO^* + 2H^* \rightleftharpoons HCO^* + H^*$                                    |                                                                                     |                                                                                     | 15. $HCO^* + H^* \rightleftharpoons H_2CO^* + *$                                    |                                                                                       |                                                                                       |
|    |    |    |    |    |    |
| 16. $CO_2^* + H^* \rightleftharpoons COOH^* + *$                                    |                                                                                     |                                                                                     | 17. $COOH^* + * \rightleftharpoons CO^* + OH^*$                                     |                                                                                       |                                                                                       |
|    |    |    |    |    |    |
| 18. $CO^* + OH^* + H^* \rightleftharpoons H_2O^* + CO^*$                            |                                                                                     |                                                                                     | 19. $CO^* \rightleftharpoons CO(g) + O_v$                                           |                                                                                       |                                                                                       |
|  |  |  |  |  |  |
| 20. $CO^* \rightleftharpoons CO(g) + *$                                             |                                                                                     |                                                                                     |                                                                                     |                                                                                       |                                                                                       |
|  |                                                                                     |  |                                                                                     |                                                                                       |                                                                                       |

Table S8. Pt-In<sub>2</sub>O<sub>3</sub>

|                                                                                     |                                                                                     |                                                                                     |                                                                                      |                                                                                       |                                                                                       |
|-------------------------------------------------------------------------------------|-------------------------------------------------------------------------------------|-------------------------------------------------------------------------------------|--------------------------------------------------------------------------------------|---------------------------------------------------------------------------------------|---------------------------------------------------------------------------------------|
| 1. $H_2 + 2 * \rightleftharpoons 2H^*$                                              |                                                                                     |                                                                                     | 2. $H^* + OH^* \rightleftharpoons H_2O^*$                                            |                                                                                       |                                                                                       |
| 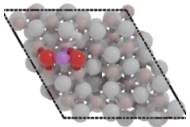   |    |    |    |    |    |
| 3. $H_2O + * \rightleftharpoons H_2O^*$                                             |                                                                                     |                                                                                     | 4. $CO_2(g) + * \rightleftharpoons CO_2^* +$                                         |                                                                                       |                                                                                       |
|    |                                                                                     |    |    |                                                                                       |    |
| 5. $CO_2^* + 2 * + H_2 \rightleftharpoons CO_2^* + 2H^*$                            |                                                                                     |                                                                                     | 6. $CO_2^* + 2H^* \rightleftharpoons HCOO^* + * + H^*$                               |                                                                                       |                                                                                       |
|    |    |    |    |    |    |
| 7. $HCOO^* + H^* \rightleftharpoons H_2COO^* + *$                                   |                                                                                     |                                                                                     | 8. $H_2COO^* \rightleftharpoons H_2CO^* + O^*$                                       |                                                                                       |                                                                                       |
|  |  |  |  |  |  |
| 9. $CH_2O^* + H_2(g) + 2 * \rightleftharpoons CH_2O^* + 2H^*$                       |                                                                                     |                                                                                     | 10. $CH_2O^* + H^* \rightleftharpoons CH_3O^* + *$                                   |                                                                                       |                                                                                       |
|  |  |  |  |  |  |
| 11. $CH_3O^* + H^* \rightleftharpoons CH_3OH(g) + *$                                |                                                                                     |                                                                                     |                                                                                      |                                                                                       |                                                                                       |
|  |  |  |                                                                                      |                                                                                       |                                                                                       |
| 12. $CO_2^* + * \rightleftharpoons CO^* + O^*$                                      |                                                                                     |                                                                                     | 13.                                                                                  |                                                                                       |                                                                                       |

|                                                                                     |                                                                                     |                                                                                     |                                                                                     |                                                                                     |                                                                                       |
|-------------------------------------------------------------------------------------|-------------------------------------------------------------------------------------|-------------------------------------------------------------------------------------|-------------------------------------------------------------------------------------|-------------------------------------------------------------------------------------|---------------------------------------------------------------------------------------|
| 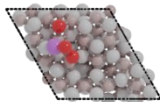   |    |    | N.A.                                                                                | N.A.                                                                                | N.A.                                                                                  |
| 14.                                                                                 |                                                                                     |                                                                                     | 15.                                                                                 |                                                                                     |                                                                                       |
| N.A.                                                                                | N.A.                                                                                | N.A.                                                                                | N.A.                                                                                | N.A.                                                                                | N.A.                                                                                  |
| 16. $CO_2^* + H^* \rightleftharpoons COOH^* + *$                                    |                                                                                     |                                                                                     | 17. $COOH^* + * \rightleftharpoons CO^* + OH^*$                                     |                                                                                     |                                                                                       |
|    |    |    |    |  |    |
| 18. $CO^* + OH^* + H^* \rightleftharpoons H_2O^* + CO^*$                            |                                                                                     |                                                                                     | 19. $CO^* \rightleftharpoons CO(g) + Ov$                                            |                                                                                     |                                                                                       |
|  |  |  |  |                                                                                     |  |
| 20. $CO^* \rightleftharpoons CO(g) + *$                                             |                                                                                     |                                                                                     |                                                                                     |                                                                                     |                                                                                       |
|  |                                                                                     |  |                                                                                     |                                                                                     |                                                                                       |

Table S9. Rh-In<sub>2</sub>O<sub>3</sub>

|                                                                                     |                                                                                     |                                                                                     |                                                                                     |                                                                                       |                                                                                       |
|-------------------------------------------------------------------------------------|-------------------------------------------------------------------------------------|-------------------------------------------------------------------------------------|-------------------------------------------------------------------------------------|---------------------------------------------------------------------------------------|---------------------------------------------------------------------------------------|
| 1. $H_2 + 2 * \rightleftharpoons 2H^*$                                              |                                                                                     |                                                                                     | 2. $H^* + OH^* \rightleftharpoons H_2O^*$                                           |                                                                                       |                                                                                       |
| 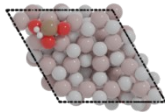   |    |    |    |    |    |
| 3. $H_2O + * \rightleftharpoons H_2O^*$                                             |                                                                                     |                                                                                     | 4. $CO_2(g) + * \rightleftharpoons CO_2^* +$                                        |                                                                                       |                                                                                       |
|    |                                                                                     |    |    |                                                                                       |    |
| 5. $CO_2^* + 2 * + H_2 \rightleftharpoons CO_2^* + 2H$                              |                                                                                     |                                                                                     | 6. $CO_2^* + 2H^* \rightleftharpoons HCOO^* + * + H^*$                              |                                                                                       |                                                                                       |
|    |    |    |    |    |    |
| 7. $HCOO^* + H^* \rightleftharpoons H_2COO^* + *$                                   |                                                                                     |                                                                                     | 8. $H_2COO^* \rightleftharpoons CH_2O^* + O^*$                                      |                                                                                       |                                                                                       |
|  |  |  |  |  |  |
| 9. $CH_2O^* + H_2(g) + 2 * \rightleftharpoons CH_2O^* + 2H^*$                       |                                                                                     |                                                                                     | 10. $CH_2O^* + H^* \rightleftharpoons CH_3O^* + *$                                  |                                                                                       |                                                                                       |
|  |  |  |  |  |  |
| 11. $CH_3O^* + H^* \rightleftharpoons CH_3OH(g) + *$                                |                                                                                     |                                                                                     |                                                                                     |                                                                                       |                                                                                       |
|  |  |  |                                                                                     |                                                                                       |                                                                                       |
| 12. $CO^*_2 + * \rightleftharpoons CO^* + O^*$                                      |                                                                                     |                                                                                     | 13. $CO^* + H_2(g) + 2 * \rightleftharpoons CO^* + 2H^*$                            |                                                                                       |                                                                                       |

|                                                                                     |                                                                                    |                                                                                     |                                                                                    |                                                                                     |                                                                                      |
|-------------------------------------------------------------------------------------|------------------------------------------------------------------------------------|-------------------------------------------------------------------------------------|------------------------------------------------------------------------------------|-------------------------------------------------------------------------------------|--------------------------------------------------------------------------------------|
| 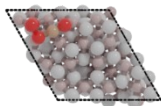   |   |    | N.A.                                                                               | N.A.                                                                                | N.A.                                                                                 |
| 14. $CO^* + 2H^* \rightleftharpoons HCO^* + H^*$                                    |                                                                                    |                                                                                     | 15. $HCO^* + H^* \rightleftharpoons H_2CO^* + *$                                   |                                                                                     |                                                                                      |
| N.A.                                                                                | N.A.                                                                               | N.A.                                                                                | N.A.                                                                               | N.A.                                                                                | N.A.                                                                                 |
| 16. $CO_2^* + H^* \rightleftharpoons COOH^* + *$                                    |                                                                                    |                                                                                     | 17. $COOH^* + * \rightleftharpoons CO^* + OH^*$                                    |                                                                                     |                                                                                      |
|    |   |    |   |  |   |
| 18. $CO^* + OH^* + H^* \rightleftharpoons H_2O^* + CO^*$                            |                                                                                    |                                                                                     | 19. $CO^* \rightleftharpoons CO(g) + Ov$                                           |                                                                                     |                                                                                      |
|   |  |   |  |                                                                                     |  |
| 20. $CO^* \rightleftharpoons CO(g) + *$                                             |                                                                                    |                                                                                     |                                                                                    |                                                                                     |                                                                                      |
|  |                                                                                    |  |                                                                                    |                                                                                     |                                                                                      |

## S5: Parameters for microkinetic simulations

**Table S10.** Kinetic parameters including ratio of partition functions of the TS and IS ( $Q_{TS}/Q_{IS}$ ) and TS and FS ( $Q_{TS}/Q_{FS}$ ), forward ( $E_{act,f}$ ) and backward ( $E_{act,b}$ ) activation energies for CO<sub>2</sub> hydrogenation to CH<sub>3</sub>OH, CO and H<sub>2</sub>O over Ni-In<sub>2</sub>O<sub>3</sub> model.

| Elementary steps                                             | $Q_{TS}/Q_{IS}$ | $Q_{TS}/Q_{FS}$ | $E_{act,f}$ (kJ/mol) | $E_{act,b}$ (kJ/mol) |
|--------------------------------------------------------------|-----------------|-----------------|----------------------|----------------------|
| Oxygen vacancy formation pathway                             |                 |                 |                      |                      |
| 1 $H_2(g) + 2 * \rightleftharpoons 2H^*$                     | 0.20            | 0.57            | 19                   | 55                   |
| 2 $H^* + OH^* \rightleftharpoons H_2O^* + O^*$               | 1.70            | 0.39            | 93                   | 66                   |
| 3 $H_2O^* \rightleftharpoons H_2O(g) + *$                    | 1.0             | 1.0             | 177                  | -                    |
| Formate pathway to CH <sub>3</sub> OH                        |                 |                 |                      |                      |
| 4 $CO_2(g) + * \rightleftharpoons CO_2^*$                    | 1.0             | 1.0             | -                    | 144                  |
| 5 $CO_2^* + H_2(g) + 2 * \rightleftharpoons CO_2^* + 2H^*$   | 0.20            | 0.57            | 19                   | 55                   |
| 6 $CO_2^* + 2H^* \rightleftharpoons HCO_2^* + H^* + *$       | 5.55            | 0.59            | 66                   | 68                   |
| 7 $HCO_2^* + H^* \rightleftharpoons H_2CO_2^* + *$           | 0.17            | 1.44            | 114                  | 34                   |
| 8 $H_2CO_2^* + * \rightleftharpoons CH_2O^* + O^*$           | 1.05            | 0.28            | 101                  | 33                   |
| 9 $CH_2O^* + H_2(g) + 2 * \rightleftharpoons CH_2O^* + 2H^*$ | 0.20            | 0.57            | 19                   | 55                   |
| 10 $CH_2O^* + 2H^* \rightleftharpoons CH_3O^* + H^*$         | 0.47            | 0.54            | 55                   | 132                  |
| 11 $CH_3O^* + H^* \rightleftharpoons CH_3OH(g)$              | 0.06            | 0.61            | 61                   | 54                   |
| CO hydrogenation pathway to CH <sub>3</sub> OH               |                 |                 |                      |                      |
| 12 $CO^*_2 + * \rightleftharpoons CO^* + O^*$                | 0.52            | 0.17            | 81                   | 78                   |
| 13 $CO^* + H_2(g) + 2 * \rightleftharpoons CO^* + 2H^*$      | 0.20            | 0.57            | 19                   | 55                   |
| 14 $CO^* + 2H^* \rightleftharpoons HCO^* + H^*$              | 0.52            | 0.17            | 71                   | 65                   |
| 15 $HCO^* + H^* \rightleftharpoons CH_2O^* + *$              | 0.20            | 0.57            | 177                  | 35                   |
| rWGS pathway to CO                                           |                 |                 |                      |                      |
| 16 $CO^*_2 + 2H^* \rightleftharpoons COOH^* + H^* + *$       | 0.31            | 0.02            | 82                   | 69                   |
| 17 $COOH^* + * \rightleftharpoons CO^* + OH^*$               | 1.13            | 0.33            | 45                   | 25                   |
| 18 $CO^* + OH^* + H^* \rightleftharpoons CO^* + H_2O^*$      | 1.51            | 0.96            | 140                  | 198                  |
| 19 $CO^* \rightleftharpoons CO(g) + Ov$                      | 1.0             | 1.0             | 51                   | -                    |
| 20 $CO^* \rightleftharpoons CO(g) + *$                       | 1.0             | 1.0             | 121                  | -                    |

Activation energies ( $E_{act}$ ) were directly obtained from DFT calculations. All DFT energies are corrected by the zero-point energy (ZPE). Numbers are the same as in Figure 3a.

Pre-exponential factors were estimated by transition state theory at  $T = 550$  K.



**Table S11.** Kinetic parameters including ratio of partition functions of the TS and IS ( $Q_{TS}/Q_{IS}$ ) and TS and FS ( $Q_{TS}/Q_{FS}$ ), forward ( $E_{act,f}$ ) and backward ( $E_{act,b}$ ) activation energies for CO<sub>2</sub> hydrogenation to CH<sub>3</sub>OH, CO and H<sub>2</sub>O over Pd-In<sub>2</sub>O<sub>3</sub> model.

| Elementary steps                                             | $Q_{TS}/Q_{IS}$ | $Q_{TS}/Q_{FS}$ | $E_{act,f}$ (kJ/mol) | $E_{act,b}$ (kJ/mol) |
|--------------------------------------------------------------|-----------------|-----------------|----------------------|----------------------|
| Oxygen vacancy formation pathway                             |                 |                 |                      |                      |
| 1 $H_2(g) + 2 * \rightleftharpoons 2H^*$                     | 0.20            | 0.57            | 62                   | 72                   |
| 2 $H^* + OH^* \rightleftharpoons H_2O^* + O^*$               | 1.70            | 0.39            | 47                   | 127                  |
| 3 $H_2O^* \rightleftharpoons H_2O(g) + *$                    | 1.0             | 1.0             | 12                   | -                    |
| Formate pathway to CH <sub>3</sub> OH                        |                 |                 |                      |                      |
| 4 $CO_2(g) + * \rightleftharpoons CO_2^*$                    | 1.0             | 1.0             | -                    | 31                   |
| 5 $CO_2^* + H_2(g) + 2 * \rightleftharpoons CO_2^* + 2H^*$   | 0.20            | 0.57            | 104                  | 247                  |
| 6 $CO_2^* + 2H^* \rightleftharpoons HCO_2^* + H^* + *$       | 5.55            | 0.59            | 40                   | 12                   |
| 7 $HCO_2^* + H^* \rightleftharpoons H_2CO_2^* + *$           | 0.17            | 1.44            | 220                  | 53                   |
| 8 $H_2CO_2^* + * \rightleftharpoons CH_2O^* + O^*$           | 1.05            | 0.28            | 62                   | 8                    |
| 9 $CH_2O^* + H_2(g) + 2 * \rightleftharpoons CH_2O^* + 2H^*$ | 0.20            | 0.57            | 73                   | 94                   |
| 10 $CH_2O^* + 2H^* \rightleftharpoons CH_3O^* + H^*$         | 0.47            | 0.54            | 62                   | 40                   |
| 11 $CH_3O^* + H^* \rightleftharpoons CH_3OH(g)$              | 0.06            | 0.61            | 106                  | 141                  |
| CO hydrogenation pathway to CH <sub>3</sub> OH               |                 |                 |                      |                      |
| 12 $CO^*_2 + * \rightleftharpoons CO^* + O^*$                | 0.52            | 0.17            | 65                   | 91                   |
| 13 $CO^* + H_2(g) + 2 * \rightleftharpoons CO^* + 2H^*$      | 0.20            | 0.57            | 41                   | 74                   |
| 14 $CO^* + 2H^* \rightleftharpoons HCO^* + H^*$              | 1.0             | 1.0             | 148                  | 55                   |
| 15 $HCO^* + H^* \rightleftharpoons CH_2O^* + *$              | 1.0             | 1.0             | 128                  | 14                   |
| rWGS pathway to CO                                           |                 |                 |                      |                      |
| 16 $CO^*_2 + 2H^* \rightleftharpoons COOH^* + H^* + *$       | 0.31            | 0.02            | 61                   | 81                   |
| 17 $COOH^* + * \rightleftharpoons CO^* + OH^*$               | 1.13            | 0.33            | 42                   | 23                   |
| 18 $CO^* + OH^* + H^* \rightleftharpoons CO^* + H_2O^*$      | 1.51            | 0.96            | 140                  | 82                   |
| 19 $CO^* \rightleftharpoons CO(g) + Ov$                      | 1.0             | 1.0             | 25                   | -                    |
| 20 $CO^* \rightleftharpoons CO(g) + *$                       | 1.0             | 1.0             | 31                   | -                    |

Activation energies ( $E_{act}$ ) were directly obtained from DFT calculations. All DFT energies are corrected by the zero-point energy (ZPE). Numbers are the same as in Figure 3b.

Pre-exponential factors were estimated by transition state theory at  $T = 550$  K.

**Table S12.** Kinetic parameters including ratio of partition functions of the TS and IS ( $Q_{TS}/Q_{IS}$ ) and TS and FS ( $Q_{TS}/Q_{FS}$ ), forward ( $E_{act,f}$ ) and backward ( $E_{act,b}$ ) activation energies for CO<sub>2</sub> hydrogenation to CH<sub>3</sub>OH, CO and H<sub>2</sub>O over Pt-In<sub>2</sub>O<sub>3</sub> model.

| Elementary steps                                             | $Q_{TS}/Q_{IS}$ | $Q_{TS}/Q_{FS}$ | $E_{act,f}$ (kJ/mol) | $E_{act,b}$ (kJ/mol) |
|--------------------------------------------------------------|-----------------|-----------------|----------------------|----------------------|
| Oxygen vacancy formation pathway                             |                 |                 |                      |                      |
| 1 $H_2(g) + 2 * \rightleftharpoons 2H^*$                     | 0.20            | 0.57            | 48                   | 144                  |
| 2 $H^* + OH^* \rightleftharpoons H_2O^* + O^*$               | 1.70            | 0.39            | 68                   | 48                   |
| 3 $H_2O^* \rightleftharpoons H_2O(g) + *$                    | 1.0             | 1.0             | 41                   | -                    |
| Formate pathway to CH <sub>3</sub> OH                        |                 |                 |                      |                      |
| 4 $CO_2(g) + * \rightleftharpoons CO_2^*$                    | 1.0             | 1.0             | -                    | 31                   |
| 5 $CO_2^* + H_2(g) + 2 * \rightleftharpoons CO_2^* + 2H^*$   | 0.20            | 0.57            | 48                   | 142                  |
| 6 $CO_2^* + 2H^* \rightleftharpoons HCO_2^* + H^* + *$       | 5.55            | 0.59            | 34                   | 66                   |
| 7 $HCO_2^* + H^* \rightleftharpoons H_2CO_2^* + *$           | 0.17            | 1.44            | 146                  | 17                   |
| 8 $H_2CO_2^* + * \rightleftharpoons CH_2O^* + O^*$           | 1.05            | 0.28            | 156                  | 56                   |
| 9 $CH_2O^* + H_2(g) + 2 * \rightleftharpoons CH_2O^* + 2H^*$ | 0.20            | 0.57            | 23                   | 203                  |
| 10 $CH_2O^* + 2H^* \rightleftharpoons CH_3O^* + H^*$         | 0.47            | 0.54            | 80                   | 65                   |
| 11 $CH_3O^* + H^* \rightleftharpoons CH_3OH_{(g)}$           | 0.06            | 0.61            | 118                  | 105                  |
| rWGS pathway to CO                                           |                 |                 |                      |                      |
| 12 $CO_2^* + * \rightleftharpoons CO^* + O^*$                | 0.52            | 0.17            | 65                   | 91                   |
| 16 $CO_2^* + 2H^* \rightleftharpoons COOH^* + H^* + *$       | 0.31            | 0.02            | 147                  | 92                   |
| 17 $COOH^* + * \rightleftharpoons CO^* + OH^*$               | 1.13            | 0.33            | 65                   | 32                   |
| 18 $CO^* + OH^* + H^* \rightleftharpoons CO^* + H_2O^*$      | 1.51            | 0.96            | 133                  | 149                  |
| 19 $CO^* \rightleftharpoons CO(g) + O^*$                     | 1.0             | 1.0             | 24                   | -                    |
| 20 $CO^* \rightleftharpoons CO(g) + *$                       | 1.0             | 1.0             | 158                  | -                    |

Activation energies ( $E_{act}$ ) were directly obtained from DFT calculations. All DFT energies are corrected by the zero-point energy (ZPE). Numbers are the same as in Figure 3c.

Pre-exponential factors were estimated by transition state theory at  $T = 550$  K.

**Table S13.** Kinetic parameters including ratio of partition functions of the TS and IS ( $Q_{TS}/Q_{IS}$ ) and TS and FS ( $Q_{TS}/Q_{FS}$ ), forward ( $E_{act,f}$ ) and backward ( $E_{act,b}$ ) activation energies for CO<sub>2</sub> hydrogenation to CH<sub>3</sub>OH, CO and H<sub>2</sub>O over Rh-In<sub>2</sub>O<sub>3</sub> model.

| Elementary steps                                             | $Q_{TS}/Q_{IS}$ | $Q_{TS}/Q_{FS}$ | $E_{act,f}$ (kJ/mol) | $E_{act,b}$ (kJ/mol) |
|--------------------------------------------------------------|-----------------|-----------------|----------------------|----------------------|
| Oxygen vacancy formation pathway                             |                 |                 |                      |                      |
| 1 $H_2(g) + 2 * \rightleftharpoons 2H^*$                     | 0.20            | 0.57            | 57                   | 201                  |
| 2 $H^* + OH^* \rightleftharpoons H_2O^* + O^*$               | 1.70            | 0.39            | 76                   | 7                    |
| 3 $H_2O^* \rightleftharpoons H_2O(g) + *$                    | 1.0             | 1.0             | 26                   | -                    |
| Formate pathway to CH <sub>3</sub> OH                        |                 |                 |                      |                      |
| 4 $CO_2(g) + * \rightleftharpoons CO_2^*$                    | 1.0             | 1.0             | -                    | 87                   |
| 5 $CO_2^* + H_2(g) + 2 * \rightleftharpoons CO_2^* + 2H^*$   | 0.20            | 0.57            | 51                   | 85                   |
| 6 $CO_2^* + 2H^* \rightleftharpoons HCO_2^* + H^* + *$       | 5.55            | 0.59            | 42                   | 95                   |
| 7 $HCO_2^* + H^* \rightleftharpoons H_2CO_2^* + *$           | 0.17            | 1.44            | 155                  | 19                   |
| 8 $H_2CO_2^* + * \rightleftharpoons CH_2O^* + O^*$           | 1.05            | 0.28            | 101                  | 34                   |
| 9 $CH_2O^* + H_2(g) + 2 * \rightleftharpoons CH_2O^* + 2H^*$ | 0.20            | 0.57            | 25                   | 209                  |
| 10 $CH_2O^* + 2H^* \rightleftharpoons CH_3O^* + H^*$         | 0.47            | 0.54            | 149                  | 133                  |
| 11 $CH_3O^* + H^* \rightleftharpoons CH_3OH_{(g)}$           | 0.06            | 0.61            | 135                  | 119                  |
| rWGS pathway to CO                                           |                 |                 |                      |                      |
| 12 $CO^*_2 + * \rightleftharpoons CO^* + O^*$                | 0.52            | 0.17            | 80                   | 78                   |
| 16 $CO^*_2 + 2H^* \rightleftharpoons COOH^* + H^* + *$       | 0.31            | 0.02            | 59                   | 138                  |
| 17 $COOH^* + * \rightleftharpoons CO^* + OH^*$               | 1.13            | 0.33            | 25                   | 45                   |
| 18 $CO^* + OH^* + H^* \rightleftharpoons CO^* + H_2O^*$      | 1.51            | 0.96            | 186                  | 68                   |
| 19 $CO^* \rightleftharpoons CO(g) + O^v$                     | 1.0             | 1.0             | 120                  | -                    |
| 20 $CO^* \rightleftharpoons CO(g) + *$                       | 1.0             | 1.0             | 215                  | -                    |

Activation energies ( $E_{act}$ ) were directly obtained from DFT calculations. All DFT energies are corrected by the zero-point energy (ZPE). Numbers are the same as in Figure 3d.

Pre-exponential factors were estimated by transition state theory at  $T = 550$  K.

## S9: Further Microkinetic simulations

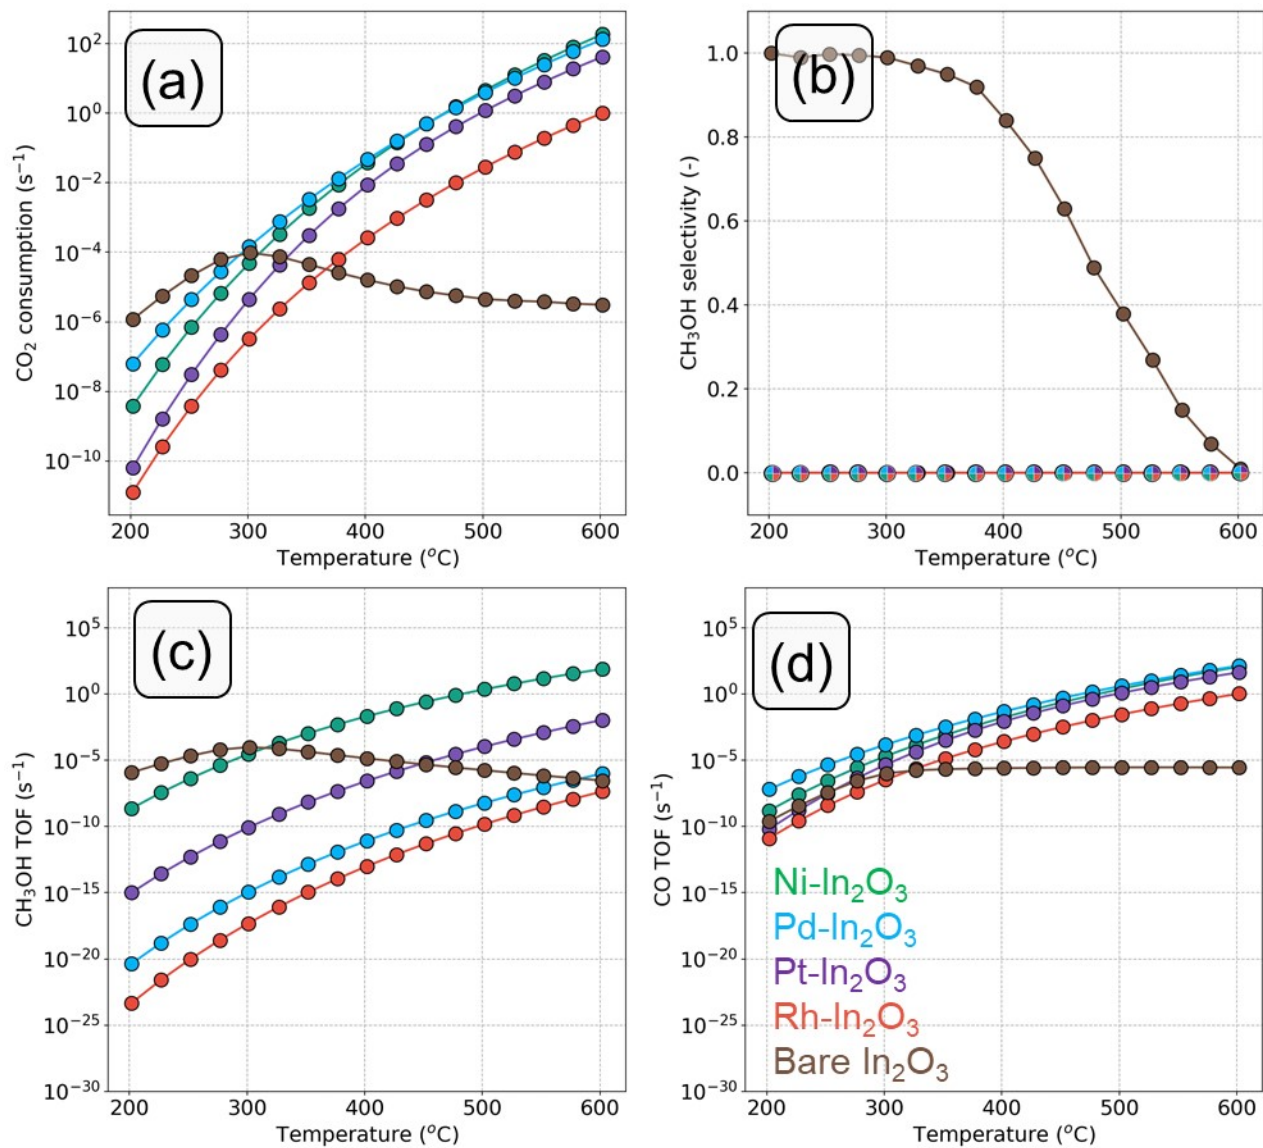

**Fig. S6:** (a) CO<sub>2</sub> consumption rate (s<sup>-1</sup>), (b) CH<sub>3</sub>OH selectivity, (c) CH<sub>3</sub>OH TOF (s<sup>-1</sup>) and (d) CO TOF in s<sup>-1</sup> as a function of temperature on SA-In<sub>2</sub>O<sub>3</sub> models (p = 50 bar, H<sub>2</sub>/CO<sub>2</sub> ratio = 5). The data for In<sub>2</sub>O<sub>3</sub>-bare are taken from reference [1]

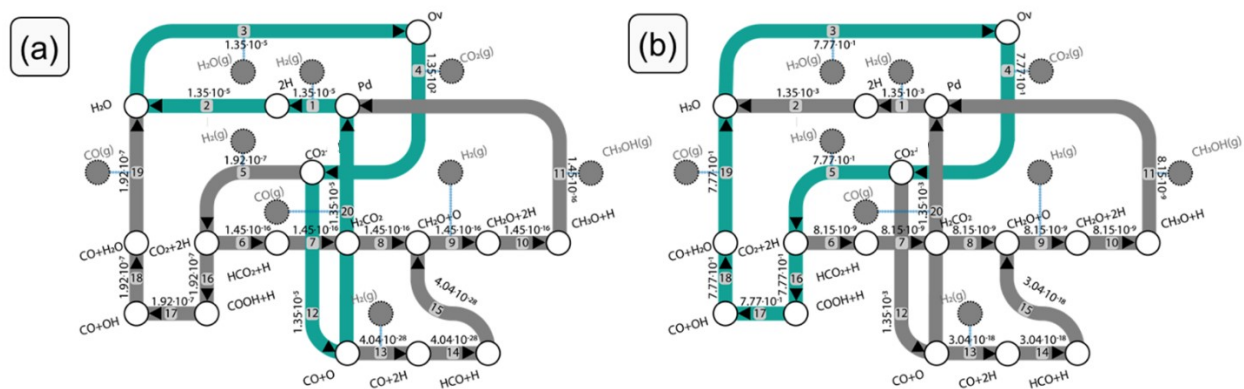

**Fig. S7.** Molar fluxes analysis for Pd-In<sub>2</sub>O<sub>3</sub>. (a)  $T = 200\text{ }^{\circ}\text{C}$  and (b)  $T = 450\text{ }^{\circ}\text{C}$ . The dominant pathway for each model is indicated by the colored pathways.

**Table S14.** Binding energies of SA-O (SA = Ni, Pd, Pt and Rh) and In-O in kJ/mol taken from ref[2].

|             | $E_b$ [kJ/mol] |
|-------------|----------------|
| <b>Ni-O</b> | 391            |
| <b>Rh-O</b> | 377            |
| <b>In-O</b> | 360            |
| <b>Pt-O</b> | 347            |
| <b>Pd-O</b> | 234            |

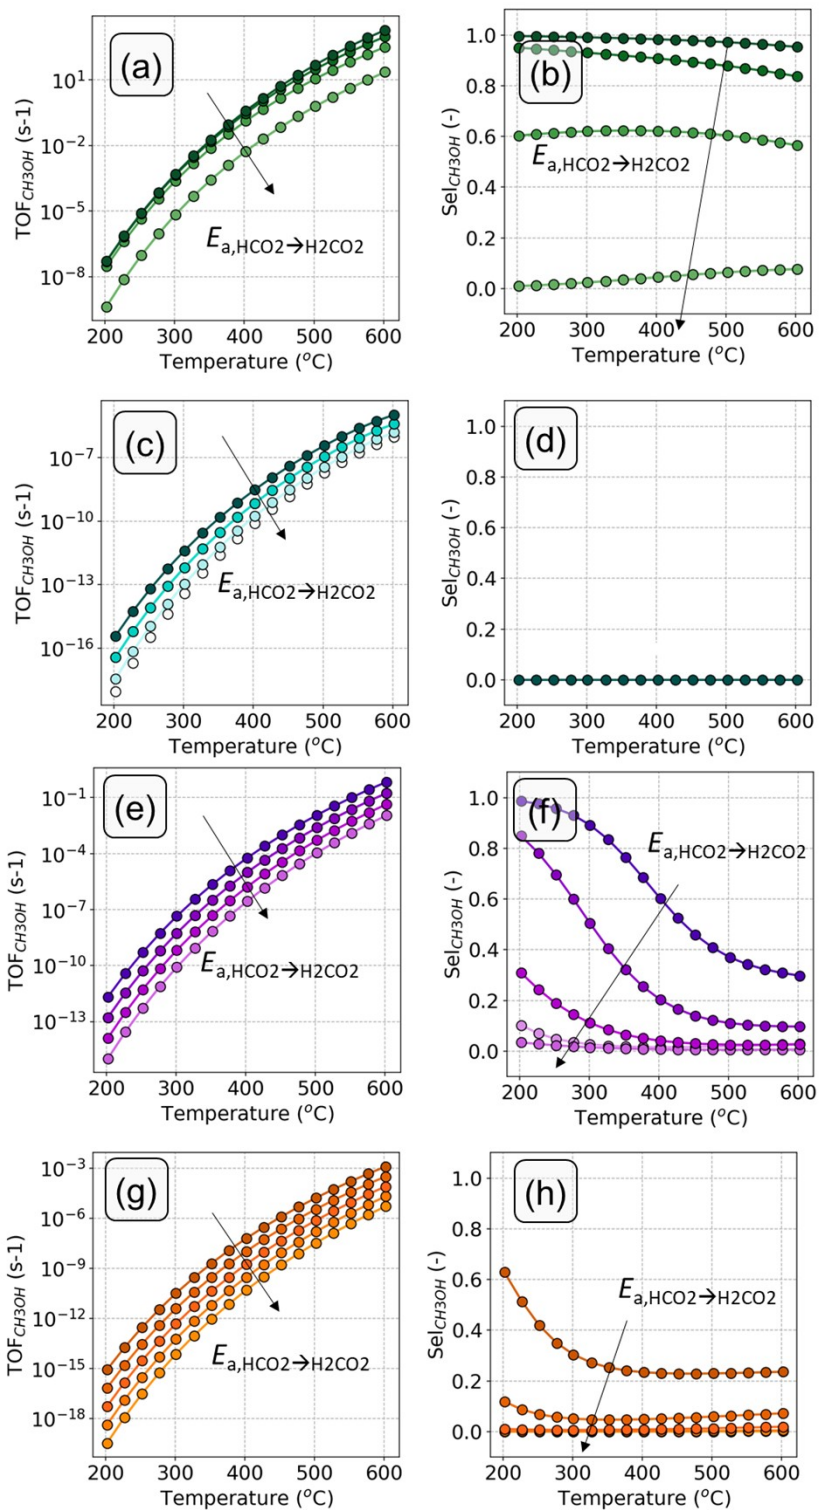

**Fig. S8.** Sensitivity of the microkinetic simulations at different values of the barrier of the step of  $\text{HCO}_2$  hydrogenation to  $\text{H}_2\text{CO}_2$  (step 7). From light to dark the activation energy energy decreases by steps of 10 kJ/mol. (a-b)  $\text{Ni-In}_2\text{O}_3$ , (c-d)  $\text{Pd-In}_2\text{O}_3$ , (e-f)  $\text{Pt-In}_2\text{O}_3$  and (g-h)  $\text{Rh-In}_2\text{O}_3$ .

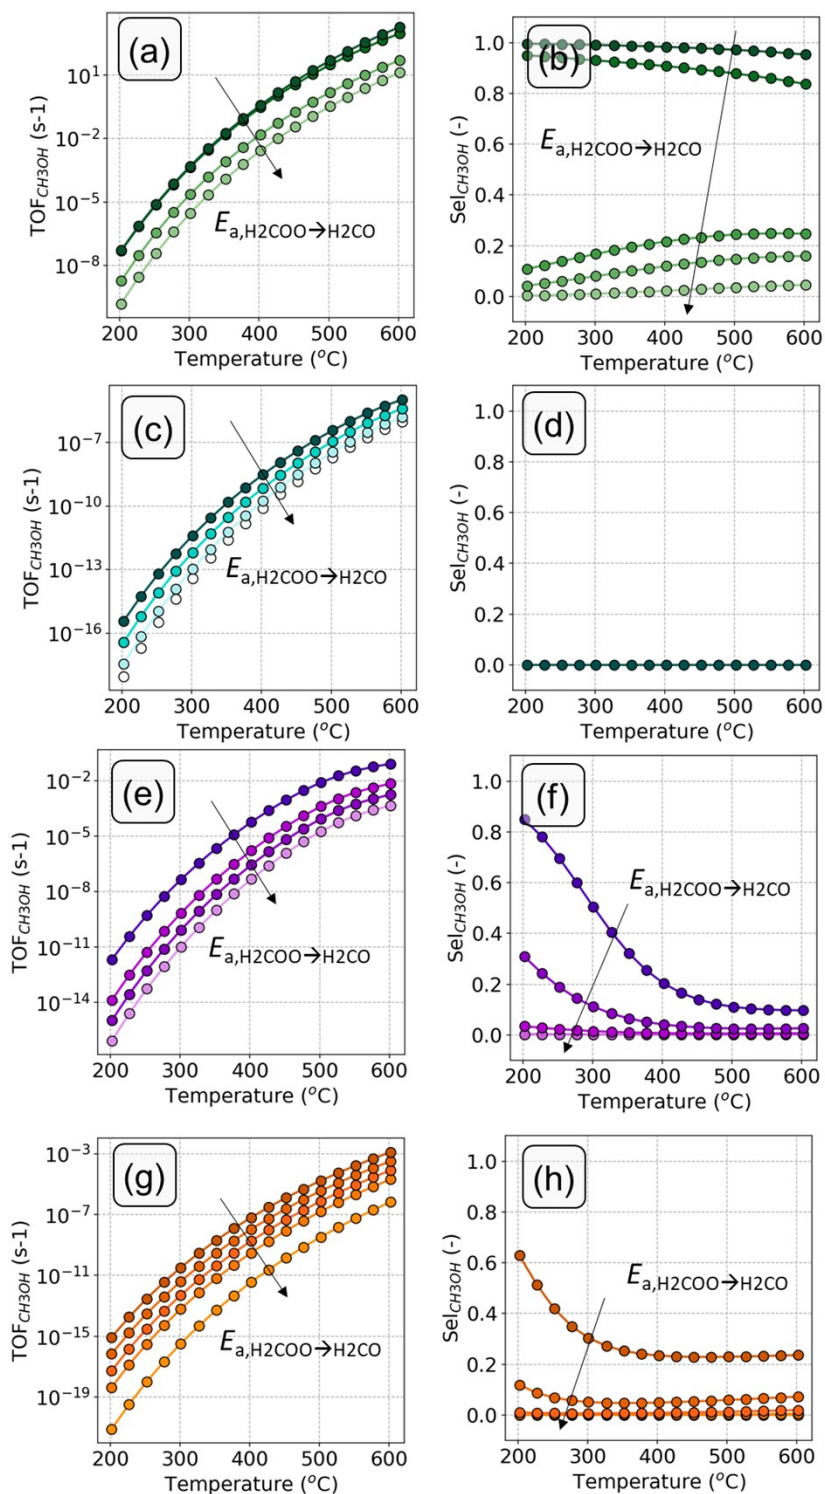

**Fig. S9.** Sensitivity of the microkinetic simulations at different values of the barrier of the step of  $\text{H}_2\text{CO}_2$  hydrogenation to  $\text{CH}_2\text{O}+\text{O}$  (step 8). From light to dark the activation energy energy decreases by steps of 10 kJ/mol. (a-b) Ni- $\text{In}_2\text{O}_3$ , (c-d) Pd- $\text{In}_2\text{O}_3$ , (e-f) Pt- $\text{In}_2\text{O}_3$  and (g-h) Rh- $\text{In}_2\text{O}_3$ .

## S10. Additional DFT Calculations

A fundamental assumption in this study was that each kinetic pathway exclusively employs a singular oxygen vacancy, in line with previous DFT calculations on  $\text{In}_2\text{O}_3$ . Although exploration of the full kinetic pathway involving a secondary vacancy is out of scope of this manuscript, we calculated a few key elementary steps. We calculated the step of HCOO hydrogenation to  $\text{H}_2\text{COO}$  on Pd- $\text{In}_2\text{O}_3$  as this step has the highest activation energy in the formate pathway to methanol. The results are reported in Tables S15-16. The presence of a second oxygen vacancy results in a lower barrier of 148 kJ/mol as opposed to the barrier of 220 kJ/mol found on Pd- $\text{In}_2\text{O}_3$  with one oxygen vacancy. Indeed, the hydrogenation from a Pd-H intermediate (Table S16) results in a lower barrier than the protonation from a O-H moiety as in the case with one Ov. However, this activation energy remains significantly higher than the main rate-limiting step (i.e.  $\text{CO}_2$  dissociation;  $E_a = 65$  kJ/mol). We can thus infer that the redox pathway remains dominant.

**Table S15.** Activation and reaction energies (kJ/mol) for the steps of HCOO hydrogenation on Pd- $\text{In}_2\text{O}_3$  with two oxygen vacancies.

| Elementary step                                                               | $E_R$ | $E_a$ |
|-------------------------------------------------------------------------------|-------|-------|
| 11 $\text{HCOO}^* + \text{H}^* \rightleftharpoons \text{H}_2\text{COO}^* + *$ | 86    | 148   |

**Table S16.** Structures of IS, TS and FS for the elementary reaction steps in Table S15.

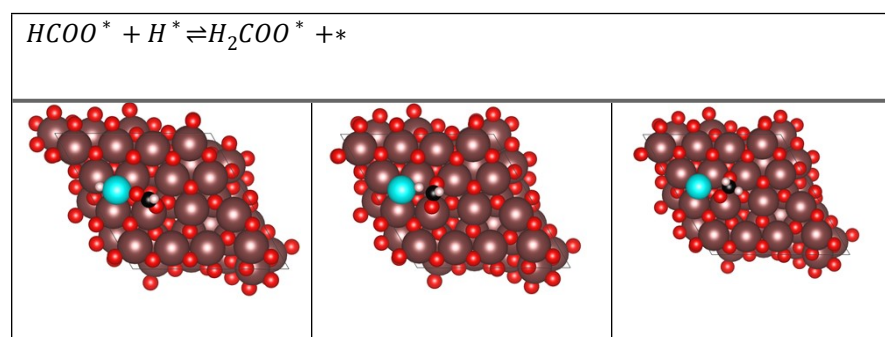

We also investigated the elementary steps of CO hydrogenation in the presence of an additional oxygen vacancy for Pt- and Rh- $\text{In}_2\text{O}_3$ . The activation and reaction energies and structures are reported in Table S17-18. In the presence of a second oxygen vacancy, the elementary steps of CO hydrogenation become accessible on Pt- $\text{In}_2\text{O}_3$ . On Rh- $\text{In}_2\text{O}_3$ , we still cannot find the TS for these elementary steps because the HCO intermediate is unstable on this model. The tables below show that the two hydrogenation steps on



Pt-In<sub>2</sub>O<sub>3</sub> are associated with activation energies of 89 and 171 kJ/mol, respectively. The last step has an higher activation energy because it occurs via migration of an O-H to a Pt-H.

**Table S17.** Activation and reaction energies (kJ/mol) for the steps of CO hydrogenation on Pt-In<sub>2</sub>O<sub>3</sub>.

| Elementary step                                 | E <sub>R</sub> | E <sub>act</sub> |
|-------------------------------------------------|----------------|------------------|
| 14 $CO^* + 2H^* \rightleftharpoons HCO^* + H^*$ | 89             | 5                |
| 15 $HCO^* + H^* \rightleftharpoons CH_2O^* + *$ | 171            | 164              |

**Table S18.** Structures of IS, TS and FS for the elementary reaction steps in Table S17.

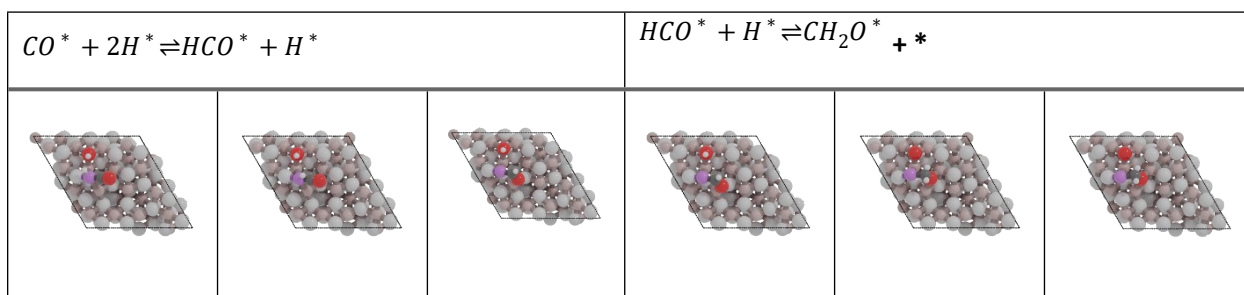

## Supporting References

- 1 M. S. Frei, M. Capdevila-Cortada, R. García-Muelas, C. Mondelli, N. López, J. A. Stewart, D. Curulla Ferré and J. Pérez-Ramírez, *J. Catal.*, 2018, **361**, 313–321.
- 2 S. W. Benson, *J. Chem. Educ.*, 1965, **42**, 502–515.
